# Supplementary material for: Design and Self Assembly of Tri-Terpene Peptide Conjugates and Their Interactions with EGFR and EGFR Mutant Receptors: An In Silico and In Vitro Study
Source: Springer Nature journal article supplement (doi:10.1007/s10989-023-10583-6), 2023-12-14
Supplement: 10989_2023_10583_MOESM1_ESM.pdf [file 10989_2023_10583_MOESM1_ESM.pdf]

## Supplementary Information

### Design and Self Assembly of Tri-Terpene Peptide Conjugates and their Interactions with EGFR and EGFR Mutant Receptors -An In Silico and In Vitro Study

Mia I. Rico<sup>‡</sup>, Beatriz G. Goncalves<sup>‡</sup>, Hannah L. Hunt, and Ipsita A. Banerjee\*

Fordham University, Department of Chemistry

441 East Fordham Road, Bronx, New York, 10458, USA

<sup>‡</sup>Co-First Authors.

\* Corresponding Author: Email: [banerjee@fordham.edu](mailto:banerjee@fordham.edu)

**Table S1a.** Predicted binding interactions as determined by PLIP for Wild Type EGFR with VPWXE and its conjugates

| VPWXE                   |             |                          |         |                 |         |                            |         |              |         |
|-------------------------|-------------|--------------------------|---------|-----------------|---------|----------------------------|---------|--------------|---------|
| Hydrogen Bonds          | Dis H-A (Å) | Hydrophobic Interactions | Dis (Å) | $\pi$ -Stacking | Dis (Å) | $\pi$ -Cation Interactions | Dis (Å) | Salt Bridges | Dis (Å) |
| LYS 721                 | 3.28        | ALA 698                  | 3.85    |                 |         |                            |         | LYS 721      | 4.87    |
| GLU 738                 | 2.47        | ALA 731                  | 3.65    |                 |         |                            |         |              |         |
| ARG 817                 | 3.06        | ILE 735                  | 3.63    |                 |         |                            |         |              |         |
| ASN 818                 | 3.00        | LEU 834                  | 3.75    |                 |         |                            |         |              |         |
| ASN 818                 | 2.86        |                          |         |                 |         |                            |         |              |         |
| ASP 831                 | 2.60        |                          |         |                 |         |                            |         |              |         |
| ASP 831                 | 2.71        |                          |         |                 |         |                            |         |              |         |
| GLY 883                 | 3.57        |                          |         |                 |         |                            |         |              |         |
| Hydroxybetulinate-VPWXE |             |                          |         |                 |         |                            |         |              |         |
| Hydrogen Bonds          | Dis H-A (Å) | Hydrophobic Interactions | Dis (Å) | $\pi$ -Stacking | Dis (Å) | $\pi$ -Cation Interactions | Dis (Å) | Salt Bridges | Dis (Å) |
| LEU 694                 | 2.19        | LEU 694                  | 3.71    |                 |         |                            |         |              |         |
| GLY 700                 | 2.95        | LEU 694                  | 3.57    |                 |         |                            |         |              |         |
| LYS 721                 | 2.57        | ALA 698                  | 3.41    |                 |         |                            |         |              |         |
| ARG 817                 | 2.28        | PHE 699                  | 3.44    |                 |         |                            |         |              |         |
| ASN 818                 | 3.18        | LYS 721                  | 3.83    |                 |         |                            |         |              |         |
| ASN 818                 | 3.43        | ILE 735                  | 3.61    |                 |         |                            |         |              |         |
| LYS 851                 | 2.37        | ARG 817                  | 3.96    |                 |         |                            |         |              |         |
|                         |             | LEU 820                  | 3.06    |                 |         |                            |         |              |         |
|                         |             | LEU 820                  | 3.92    |                 |         |                            |         |              |         |
|                         |             | ASP 831                  | 3.78    |                 |         |                            |         |              |         |
|                         |             | LEU 834                  | 3.77    |                 |         |                            |         |              |         |
| Oleanolate-VPWXE        |             |                          |         |                 |         |                            |         |              |         |
| Hydrogen Bonds          | Dis H-A (Å) | Hydrophobic Interactions | Dis (Å) | $\pi$ -Stacking | Dis (Å) | $\pi$ -Cation Interactions | Dis (Å) | Salt Bridges | Dis (Å) |
| LYS 721                 | 2.55        | ALA 698                  | 3.61    |                 |         |                            |         | LYS 721      | 3.97    |
| GLU 734                 | 3.35        | PHE 699                  | 3.54    |                 |         |                            |         |              |         |
| ASP 737                 | 3.06        | VAL 702                  | 3.54    |                 |         |                            |         |              |         |
| ASP 813                 | 2.64        | GLU 734                  | 3.46    |                 |         |                            |         |              |         |
| ARG 817                 | 1.92        | LEU 820                  | 3.42    |                 |         |                            |         |              |         |
| ARG 817                 | 2.40        | THR 830                  | 3.94    |                 |         |                            |         |              |         |
| THR 830                 | 2.38        | ASP 831                  | 3.60    |                 |         |                            |         |              |         |
| LYS 851                 | 2.43        | LEU 834                  | 3.51    |                 |         |                            |         |              |         |
|                         |             | LEU 834                  | 3.52    |                 |         |                            |         |              |         |





|                                             |             |                          |         |                 |         |                            |         |              |         |
|---------------------------------------------|-------------|--------------------------|---------|-----------------|---------|----------------------------|---------|--------------|---------|
| ARG 779                                     | 3.10        |                          |         |                 |         |                            |         |              |         |
| ARG 779                                     | 2.64        |                          |         |                 |         |                            |         |              |         |
| ARG 817                                     | 2.85        |                          |         |                 |         |                            |         |              |         |
| ARG 817                                     | 2.31        |                          |         |                 |         |                            |         |              |         |
| ARG 817                                     | 3.35        |                          |         |                 |         |                            |         |              |         |
| ARG 817                                     | 2.18        |                          |         |                 |         |                            |         |              |         |
| ASP 831                                     | 2.99        |                          |         |                 |         |                            |         |              |         |
| ASP 831                                     | 2.54        |                          |         |                 |         |                            |         |              |         |
| ASP 831                                     | 2.26        |                          |         |                 |         |                            |         |              |         |
| ASP 831                                     | 2.73        |                          |         |                 |         |                            |         |              |         |
| GLY 833                                     | 3.14        |                          |         |                 |         |                            |         |              |         |
| LYS 851                                     | 2.38        |                          |         |                 |         |                            |         |              |         |
| <b>(Hydroxy betulinat<sub>2</sub>)-MFSL</b> |             |                          |         |                 |         |                            |         |              |         |
| Hydrogen Bonds                              | Dis H-A (Å) | Hydrophobic Interactions | Dis (Å) | $\pi$ -Stacking | Dis (Å) | $\pi$ -Cation Interactions | Dis (Å) | Salt Bridges | Dis (Å) |
| LYS 692                                     | 2.21        | LEU 649                  | 3.89    |                 |         |                            |         | ARG 817A     | 4.19    |
| VAL 693                                     | 1.99        | ALA 698                  | 3.58    |                 |         |                            |         |              |         |
| LYS 704                                     | 2.27        | VAL 702                  | 3.47    |                 |         |                            |         |              |         |
| CYS 773                                     | 3.00        | LYS 704                  | 3.75    |                 |         |                            |         |              |         |
| ASP 776                                     | 1.92        | LYS 721                  | 3.55    |                 |         |                            |         |              |         |
| ASP 776                                     | 2.52        | PRO 770                  | 3.66    |                 |         |                            |         |              |         |
| LYS 822                                     | 2.07        | LYS 855                  | 3.45    |                 |         |                            |         |              |         |
| ASP 831                                     | 2.54        | TRP 856                  | 3.96    |                 |         |                            |         |              |         |
| ASP 831                                     | 2.68        | ASP 988                  | 3.98    |                 |         |                            |         |              |         |
| LYS 855                                     | 2.85        |                          |         |                 |         |                            |         |              |         |
| <b>(Oleanolat<sub>2</sub>)-MFSL</b>         |             |                          |         |                 |         |                            |         |              |         |
| Hydrogen Bonds                              | Dis H-A (Å) | Hydrophobic Interactions | Dis (Å) | $\pi$ -Stacking | Dis (Å) | $\pi$ -Cation Interactions | Dis (Å) | Salt Bridges | Dis (Å) |
| SER 696                                     | 2.28        | VAL 702                  | 3.58    |                 |         |                            |         |              |         |
| LYS 721                                     | 2.69        | PHE 771                  | 3.68    |                 |         |                            |         |              |         |
| ARG 779                                     | 2.67        | LEU 834                  | 3.98    |                 |         |                            |         |              |         |
| ARG 779                                     | 2.02        | LYS 851                  | 3.61    |                 |         |                            |         |              |         |
| ARG 817                                     | 2.08        | PRO 853                  | 3.65    |                 |         |                            |         |              |         |
| ARG 817                                     | 3.26        |                          |         |                 |         |                            |         |              |         |
| ASN 818                                     | 2.93        |                          |         |                 |         |                            |         |              |         |
| ASN 818                                     | 3.24        |                          |         |                 |         |                            |         |              |         |
| <b>(Perillat<sub>2</sub>)-MFSL</b>          |             |                          |         |                 |         |                            |         |              |         |
| Hydrogen Bonds                              | Dis H-A (Å) | Hydrophobic Interactions | Dis (Å) | $\pi$ -Stacking | Dis (Å) | $\pi$ -Cation Interactions | Dis (Å) | Salt Bridges | Dis (Å) |
| SER 696                                     | 2.59        | LEU 775                  | 3.93    |                 |         |                            |         | LYS 721      | 3.96    |
| LYS 721                                     | 2.12        | ARG 817                  | 3.93    |                 |         |                            |         |              |         |
| THR 830                                     | 3.57        | ARG 817                  | 3.69    |                 |         |                            |         |              |         |
| VAL 852                                     | 2.94        | ASP 831                  | 3.77    |                 |         |                            |         |              |         |
| LYS 855                                     | 3.14        | LEU 834                  | 3.91    |                 |         |                            |         |              |         |
|                                             |             | PRO 853                  | 3.65    |                 |         |                            |         |              |         |
|                                             |             | LYS 855                  | 3.73    |                 |         |                            |         |              |         |
|                                             |             | TRP 856                  | 3.45    |                 |         |                            |         |              |         |
|                                             |             | LYS 889                  | 3.65    |                 |         |                            |         |              |         |
| <b>(Ursolat<sub>2</sub>)-MFSL</b>           |             |                          |         |                 |         |                            |         |              |         |
| Hydrogen Bonds                              | Dis H-A (Å) | Hydrophobic Interactions | Dis (Å) | $\pi$ -Stacking | Dis (Å) | $\pi$ -Cation Interactions | Dis (Å) | Salt Bridges | Dis (Å) |
| LYS 692                                     | 2.51        | PHE 771                  | 3.57    |                 |         |                            |         |              |         |
| GLU 734                                     | 3.42        | TYR 777                  | 3.73    |                 |         |                            |         |              |         |
| CYS 773                                     | 2.21        | LEU 820                  | 3.48    |                 |         |                            |         |              |         |
| ASP 813                                     | 2.79        | LEU 834                  | 3.55    |                 |         |                            |         |              |         |
| ARG 817                                     | 1.85        | LEU 834                  | 3.79    |                 |         |                            |         |              |         |
| ARG 817                                     | 3.29        | ALA 847                  | 3.90    |                 |         |                            |         |              |         |
| ASN 818                                     | 2.88        | LYS 855                  | 3.96    |                 |         |                            |         |              |         |
|                                             |             | TRP 856                  | 3.79    |                 |         |                            |         |              |         |
|                                             |             | TRP 856                  | 3.25    |                 |         |                            |         |              |         |
|                                             |             | LYS 889                  | 3.03    |                 |         |                            |         |              |         |

**Table S2b.** Predicted binding interactions as determined by PLIP for T790M/L858R EGFR with MEGPSKCCESLALSH (MFSL) and its conjugates

| <b>MFSL</b>                                 |             |                          |                     |                 |                     |                            |                     |              |                     |
|---------------------------------------------|-------------|--------------------------|---------------------|-----------------|---------------------|----------------------------|---------------------|--------------|---------------------|
| Hydrogen Bonds                              | Dis H-A (Å) | Hydrophobic Interactions | D <sub>is</sub> (Å) | $\pi$ -Stacking | D <sub>is</sub> (Å) | $\pi$ -Cation Interactions | D <sub>is</sub> (Å) | Salt Bridges | D <sub>is</sub> (Å) |
| SER 720                                     | 3.58        | LEU 718                  | 3.35                | PHE 856A        | 5.16                |                            |                     |              |                     |
| LYS 745                                     | 2.58        | ALA 722                  | 3.6                 |                 |                     |                            |                     |              |                     |
| LYS 745                                     | 3.09        | VAL 726                  | 3.15                |                 |                     |                            |                     |              |                     |
| ARG 803                                     | 2.29        | LYS 745                  | 3.91                |                 |                     |                            |                     |              |                     |
| ARG 841                                     | 2.09        | LEU 792                  | 3.6                 |                 |                     |                            |                     |              |                     |
| ARG 841                                     | 2.49        | LEU 844                  | 3.63                |                 |                     |                            |                     |              |                     |
| ARG 841                                     | 2.48        | LEU 844                  | 3.87                |                 |                     |                            |                     |              |                     |
| ARG 841                                     | 2.83        | TRP 880                  | 3.58                |                 |                     |                            |                     |              |                     |
| THR 854                                     | 3.24        | PHE 997                  | 3.67                |                 |                     |                            |                     |              |                     |
| THR 854                                     | 2.1         |                          |                     |                 |                     |                            |                     |              |                     |
| THR 854                                     | 1.78        |                          |                     |                 |                     |                            |                     |              |                     |
| ASP 855                                     | 1.91        |                          |                     |                 |                     |                            |                     |              |                     |
| ASP 855                                     | 2.89        |                          |                     |                 |                     |                            |                     |              |                     |
| PHE 856                                     | 3.17        |                          |                     |                 |                     |                            |                     |              |                     |
| VAL 876                                     | 2.08        |                          |                     |                 |                     |                            |                     |              |                     |
| ILE 878                                     | 3.09        |                          |                     |                 |                     |                            |                     |              |                     |
| <b>(Hydroxy betulinat<sub>2</sub>)-MFSL</b> |             |                          |                     |                 |                     |                            |                     |              |                     |
| Hydrogen Bonds                              | Dis H-A (Å) | Hydrophobic Interactions | D <sub>is</sub> (Å) | $\pi$ -Stacking | D <sub>is</sub> (Å) | $\pi$ -Cation Interactions | D <sub>is</sub> (Å) | Salt Bridges | D <sub>is</sub> (Å) |
| ALA 722                                     | 2.40        | LEU 718                  | 3.58                |                 |                     |                            |                     | LYS 745      | 4.71                |
| ASP 800                                     | 2.68        | ALA 722                  | 3.32                |                 |                     |                            |                     |              |                     |
| ASP 800                                     | 2.88        | PHE 723                  | 3.90                |                 |                     |                            |                     |              |                     |
| ARG 803                                     | 2.49        | ALA 743                  | 3.66                |                 |                     |                            |                     |              |                     |
| ARG 841                                     | 2.91        | ARG 803                  | 3.40                |                 |                     |                            |                     |              |                     |
| ARG 841                                     | 2.62        | GLU 804                  | 3.88                |                 |                     |                            |                     |              |                     |
| ASN 842                                     | 3.05        | VAL 876                  | 3.37                |                 |                     |                            |                     |              |                     |
| THR 854                                     | 2.19        | ILE 878                  | 3.43                |                 |                     |                            |                     |              |                     |
| THR 854                                     | 2.31        | LYS 879                  | 3.60                |                 |                     |                            |                     |              |                     |
| ASP 855                                     | 2.48        | TYR 891                  | 3.83                |                 |                     |                            |                     |              |                     |
| ASP 855                                     | 3.37        | ALA 920                  | 3.62                |                 |                     |                            |                     |              |                     |
| ASN 996                                     | 1.76        | PHE 997                  | 3.55                |                 |                     |                            |                     |              |                     |
| <b>(Oleanolat<sub>2</sub>)-MFSL</b>         |             |                          |                     |                 |                     |                            |                     |              |                     |
| Hydrogen Bonds                              | Dis H-A (Å) | Hydrophobic Interactions | D <sub>is</sub> (Å) | $\pi$ -Stacking | D <sub>is</sub> (Å) | $\pi$ -Cation Interactions | D <sub>is</sub> (Å) | Salt Bridges | D <sub>is</sub> (Å) |
| LEU 718                                     | 2.16        | VAL 717                  | 3.93                |                 |                     | ARG 803                    | 5.09                |              |                     |
| ARG 803                                     | 1.92        | VAL 717                  | 3.68                |                 |                     |                            |                     |              |                     |
| ARG 803                                     | 2.36        | LEU 718                  | 3.50                |                 |                     |                            |                     |              |                     |
| ARG 841                                     | 2.96        | ASN 996                  | 3.05                |                 |                     |                            |                     |              |                     |
| ARG 841                                     | 2.94        | PHE 997                  | 3.49                |                 |                     |                            |                     |              |                     |
| LYS 879                                     | 2.67        | PHE 997                  | 3.67                |                 |                     |                            |                     |              |                     |
| LYS 879                                     | 3.12        |                          |                     |                 |                     |                            |                     |              |                     |
| GLU 906                                     | 3.54        |                          |                     |                 |                     |                            |                     |              |                     |
| <b>(Perillat<sub>2</sub>)-MFSL</b>          |             |                          |                     |                 |                     |                            |                     |              |                     |
| Hydrogen Bonds                              | Dis H-A (Å) | Hydrophobic Interactions | D <sub>is</sub> (Å) | $\pi$ -Stacking | D <sub>is</sub> (Å) | $\pi$ -Cation Interactions | D <sub>is</sub> (Å) | Salt Bridges | D <sub>is</sub> (Å) |
| LEU 718                                     | 2.75        | ALA 722                  | 3.54                |                 |                     |                            |                     |              |                     |
| ALA 722                                     | 2.21        | PHE 723                  | 3.94                |                 |                     |                            |                     |              |                     |
| MET 793                                     | 3.15        | LEU 799                  | 3.63                |                 |                     |                            |                     |              |                     |
| MET 793                                     | 2.83        | ARG 836                  | 3.72                |                 |                     |                            |                     |              |                     |
| ARG 803                                     | 2.28        | ASP 837                  | 3.90                |                 |                     |                            |                     |              |                     |
| ARG 803                                     | 2.90        | ARG 841                  | 3.45                |                 |                     |                            |                     |              |                     |
| ASP 837                                     | 2.44        | LEU 844                  | 3.60                |                 |                     |                            |                     |              |                     |
| ASP 837                                     | 2.16        | LYS 879                  | 3.84                |                 |                     |                            |                     |              |                     |
| ARG 841                                     | 3.19        | TRP 880                  | 3.25                |                 |                     |                            |                     |              |                     |
| ASN 842                                     | 2.10        | TYR 891                  | 3.67                |                 |                     |                            |                     |              |                     |
| ASN 842                                     | 3.17        | TYR 891                  | 3.82                |                 |                     |                            |                     |              |                     |
| THR 854                                     | 3.22        | LYS 913                  | 3.37                |                 |                     |                            |                     |              |                     |
| VAL 876                                     | 3.11        | PRO 914                  | 3.87                |                 |                     |                            |                     |              |                     |

|                                    |             | ALA 920                  | 3.41    |                 |         |                            |         |              |         |
|------------------------------------|-------------|--------------------------|---------|-----------------|---------|----------------------------|---------|--------------|---------|
| <b>(Ursolate)<sub>2</sub>-MFSL</b> |             |                          |         |                 |         |                            |         |              |         |
| Hydrogen Bonds                     | Dis H-A (Å) | Hydrophobic Interactions | Dis (Å) | $\pi$ -Stacking | Dis (Å) | $\pi$ -Cation Interactions | Dis (Å) | Salt Bridges | Dis (Å) |
| SER 720                            | 2.21        | VAL 717                  | 3.42    |                 |         |                            |         |              |         |
| SER 720                            | 2.52        | LEU 718                  | 3.97    |                 |         |                            |         |              |         |
| GLY 721                            | 2.14        | VAL 726                  | 3.66    |                 |         |                            |         |              |         |
| MET 793                            | 2.28        | ALA 743                  | 3.50    |                 |         |                            |         |              |         |
| ARG 841                            | 2.20        | ARG 748                  | 3.92    |                 |         |                            |         |              |         |
| ARG 841                            | 2.85        | LEU 799                  | 3.65    |                 |         |                            |         |              |         |
| ARG 841                            | 2.76        | PRO 877                  | 3.60    |                 |         |                            |         |              |         |
| THR 854                            | 2.01        | PHE 997                  | 3.94    |                 |         |                            |         |              |         |
| ASP 855                            | 2.41        | PHE 997                  | 3.76    |                 |         |                            |         |              |         |
| VAL 876                            | 2.44        |                          |         |                 |         |                            |         |              |         |
| VAL 876                            | 1.87        |                          |         |                 |         |                            |         |              |         |

**Table S3a.** Predicted binding interactions as determined by PLIP for Wild Type EGFR with neat, unconjugated terpenes.

| <b>Hydroxybetulinic acid</b> |             |                          |         |                 |         |                            |         |              |         |
|------------------------------|-------------|--------------------------|---------|-----------------|---------|----------------------------|---------|--------------|---------|
| Hydrogen Bonds               | Dis H-A (Å) | Hydrophobic Interactions | Dis (Å) | $\pi$ -Stacking | Dis (Å) | $\pi$ -Cation Interactions | Dis (Å) | Salt Bridges | Dis (Å) |
| ASP 831                      | 2.26        | LEU 694                  | 3.87    |                 |         |                            |         | LYS 721      | 3.18    |
|                              |             | LEU 694                  | 3.98    |                 |         |                            |         |              |         |
|                              |             | VAL 702                  | 3.39    |                 |         |                            |         |              |         |
|                              |             | VAL 702                  | 3.89    |                 |         |                            |         |              |         |
|                              |             | LYS 721                  | 3.80    |                 |         |                            |         |              |         |
|                              |             | LYS 721                  | 3.72    |                 |         |                            |         |              |         |
|                              |             | LEU 820                  | 3.39    |                 |         |                            |         |              |         |
| <b>Oleanolic acid</b>        |             |                          |         |                 |         |                            |         |              |         |
| Hydrogen Bonds               | Dis H-A (Å) | Hydrophobic Interactions | Dis (Å) | $\pi$ -Stacking | Dis (Å) | $\pi$ -Cation Interactions | Dis (Å) | Salt Bridges | Dis (Å) |
| MET 769                      | 2.10        | LEU 694                  | 3.70    |                 |         |                            |         |              |         |
|                              |             | LEU 694                  | 3.46    |                 |         |                            |         |              |         |
|                              |             | VAL 702                  | 3.29    |                 |         |                            |         |              |         |
|                              |             | LEU 820                  | 3.76    |                 |         |                            |         |              |         |
| <b>Ursolic acid</b>          |             |                          |         |                 |         |                            |         |              |         |
| Hydrogen Bonds               | Dis H-A (Å) | Hydrophobic Interactions | Dis (Å) | $\pi$ -Stacking | Dis (Å) | $\pi$ -Cation Interactions | Dis (Å) | Salt Bridges | Dis (Å) |
| LYS 721                      | 3.17        | LEU 820                  | 3.22    |                 |         |                            |         |              |         |
| GLU 738                      | 3.78        |                          |         |                 |         |                            |         |              |         |
| <b>Perillic acid</b>         |             |                          |         |                 |         |                            |         |              |         |
| Hydrogen Bonds               | Dis H-A (Å) | Hydrophobic Interactions | Dis (Å) | $\pi$ -Stacking | Dis (Å) | $\pi$ -Cation Interactions | Dis (Å) | Salt Bridges | Dis (Å) |
|                              |             | ALA 731                  | 3.39    |                 |         |                            |         |              |         |
|                              |             | ILE 735                  | 3.53    |                 |         |                            |         |              |         |
|                              |             | ILE 735                  | 3.64    |                 |         |                            |         |              |         |

**Table S3b.** Predicted binding interactions as determined by PLIP for EGFR (T790M/L858R) with neat, unconjugated terpenes.

| <b>Hydroxybetulinic acid</b> |             |                          |         |                 |         |                            |         |              |         |
|------------------------------|-------------|--------------------------|---------|-----------------|---------|----------------------------|---------|--------------|---------|
| Hydrogen Bonds               | Dis H-A (Å) | Hydrophobic Interactions | Dis (Å) | $\pi$ -Stacking | Dis (Å) | $\pi$ -Cation Interactions | Dis (Å) | Salt Bridges | Dis (Å) |
| ILE 878                      | 2.14        | PRO 877                  | 3.61    |                 |         |                            |         |              |         |
| LYS 879                      | 2.20        | LYS 879                  | 3.20    |                 |         |                            |         |              |         |
|                              |             | TRP 880                  | 3.60    |                 |         |                            |         |              |         |
| <b>Oleanolic acid</b>        |             |                          |         |                 |         |                            |         |              |         |
| Hydrogen Bonds               | Dis H-A (Å) | Hydrophobic Interactions | Dis (Å) | $\pi$ -Stacking | Dis (Å) | $\pi$ -Cation Interactions | Dis (Å) | Salt Bridges | Dis (Å) |
|                              |             | LEU 718                  | 3.55    |                 |         |                            |         |              |         |
|                              |             | LEU 718                  | 3.35    |                 |         |                            |         |              |         |
|                              |             | VAL 726                  | 3.40    |                 |         |                            |         |              |         |
|                              |             | ALA 743                  | 3.09    |                 |         |                            |         |              |         |
|                              |             | ARG 841                  | 3.53    |                 |         |                            |         |              |         |
|                              |             | THR 854                  | 3.67    |                 |         |                            |         |              |         |
| <b>Ursolic acid</b>          |             |                          |         |                 |         |                            |         |              |         |

| Hydrogen Bonds       | Dis H-A (Å) | Hydrophobic Interactions | Dis (Å) | $\pi$ -Stacking | Dis (Å) | $\pi$ -Cation Interactions | Dis (Å) | Salt Bridges | Dis (Å) |
|----------------------|-------------|--------------------------|---------|-----------------|---------|----------------------------|---------|--------------|---------|
|                      |             | LEU 718                  | 3.84    |                 |         |                            |         |              |         |
|                      |             | LEU 718                  | 3.49    |                 |         |                            |         |              |         |
|                      |             | VAL 726                  | 3.48    |                 |         |                            |         |              |         |
|                      |             | VAL 726                  | 3.56    |                 |         |                            |         |              |         |
|                      |             | ALA 743                  | 3.89    |                 |         |                            |         |              |         |
|                      |             | ARG 841                  | 3.50    |                 |         |                            |         |              |         |
|                      |             | LEU 844                  | 3.47    |                 |         |                            |         |              |         |
|                      |             | LEU 844                  | 3.68    |                 |         |                            |         |              |         |
|                      |             | THR 854                  | 3.69    |                 |         |                            |         |              |         |
| <b>Perillic acid</b> |             |                          |         |                 |         |                            |         |              |         |
| Hydrogen Bonds       | Dis H-A (Å) | Hydrophobic Interactions | Dis (Å) | $\pi$ -Stacking | Dis (Å) | $\pi$ -Cation Interactions | Dis (Å) | Salt Bridges | Dis (Å) |
| GLY 857              | 2.25        | PHE 723                  | 3.81    |                 |         |                            |         |              |         |
| ALA 859              | 3.16        | PHE 723                  | 3.78    |                 |         |                            |         |              |         |
|                      |             | PHE 723                  | 3.53    |                 |         |                            |         |              |         |
|                      |             | LEU 747                  | 3.57    |                 |         |                            |         |              |         |
|                      |             | LEU 747                  | 3.80    |                 |         |                            |         |              |         |
|                      |             | ILE 759                  | 3.98    |                 |         |                            |         |              |         |
|                      |             | GLU 762                  | 3.74    |                 |         |                            |         |              |         |
|                      |             | ARG 858                  | 3.56    |                 |         |                            |         |              |         |

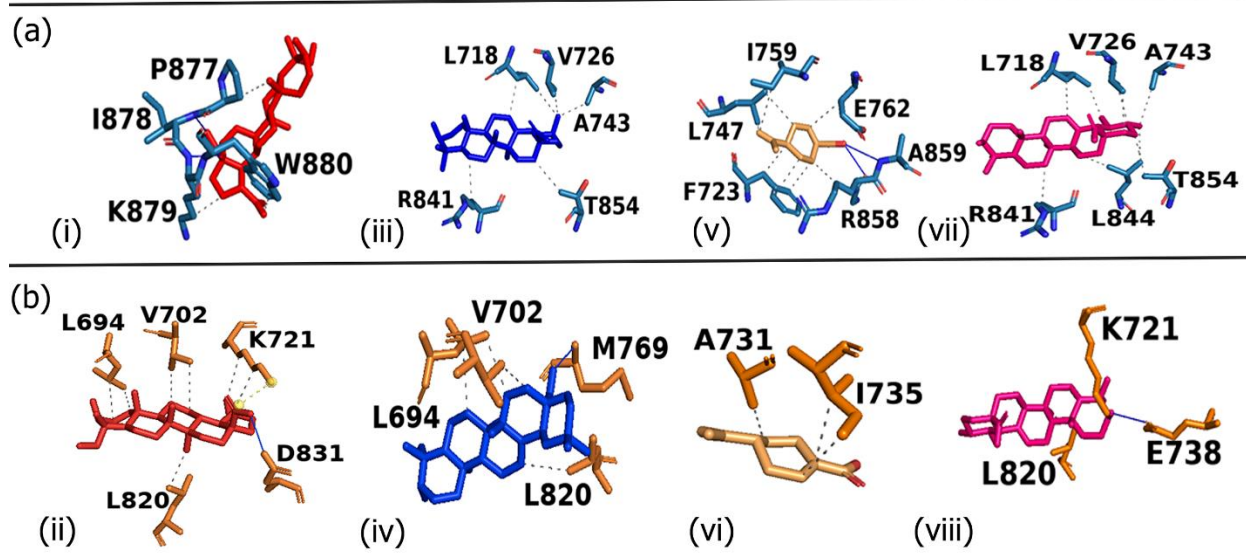

**Figure S1.** Binding interactions with neat terpenes. (a) with T790M/L858R; (b) with wild type EGFR. (i) and (ii) Hydroxybetulinic acid; (iii) and (iv) oleanolic acid; (v) and (vi) perillic acid; (vii) and (viii) ursolic acid .

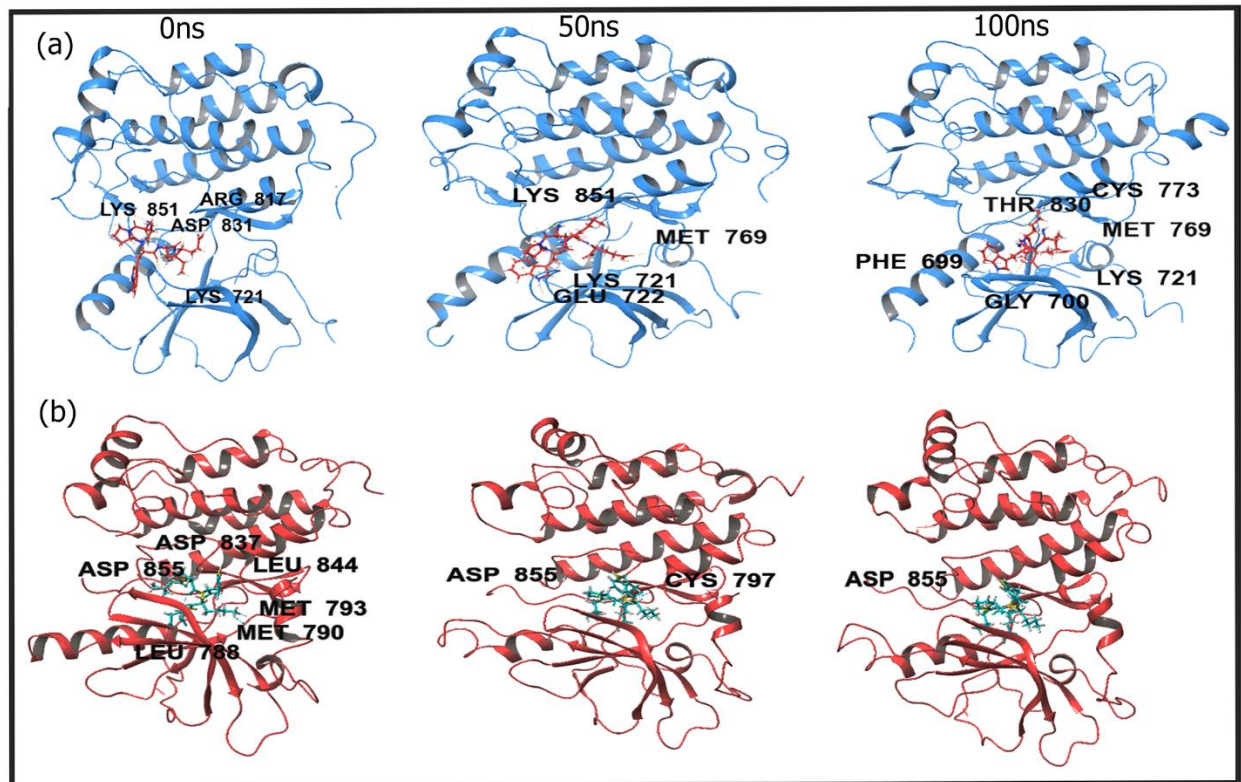

**Figure S2.** Trajectory snapshots of 100 ns MD simulation of VPWXE peptide with (a) EGFR (wild type); (b) EGFR T790M/L858R. Left to right – 0ns, 50ns and 100ns.



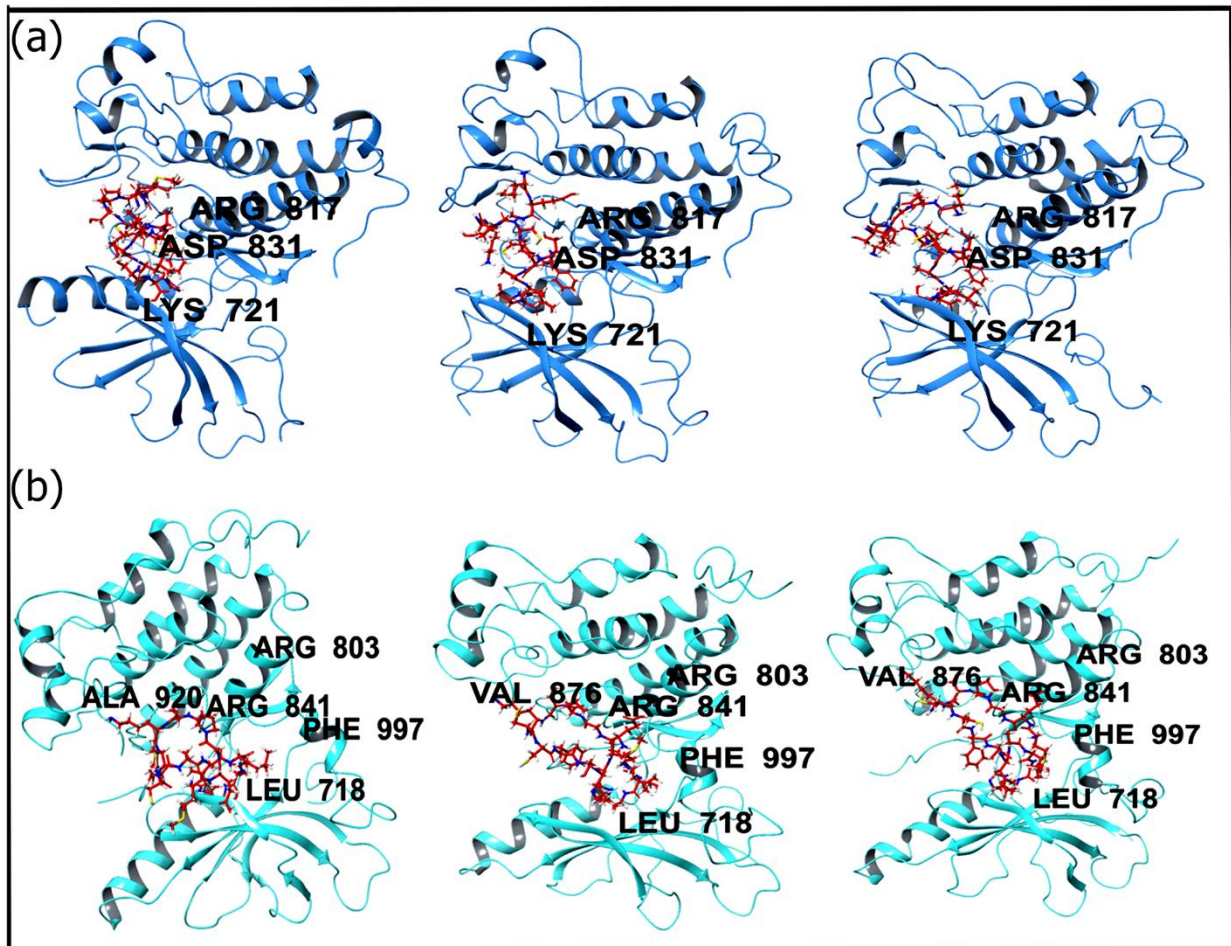

**Figure S3.** Trajectory snapshots of 100 ns MD simulation of neat MEGPSKCCFSLALSH (MFSL) peptide with (a) EGFR (wild type); (b) EGFR T790M/L858R. Left to right – 0ns, 50ns and 100ns.

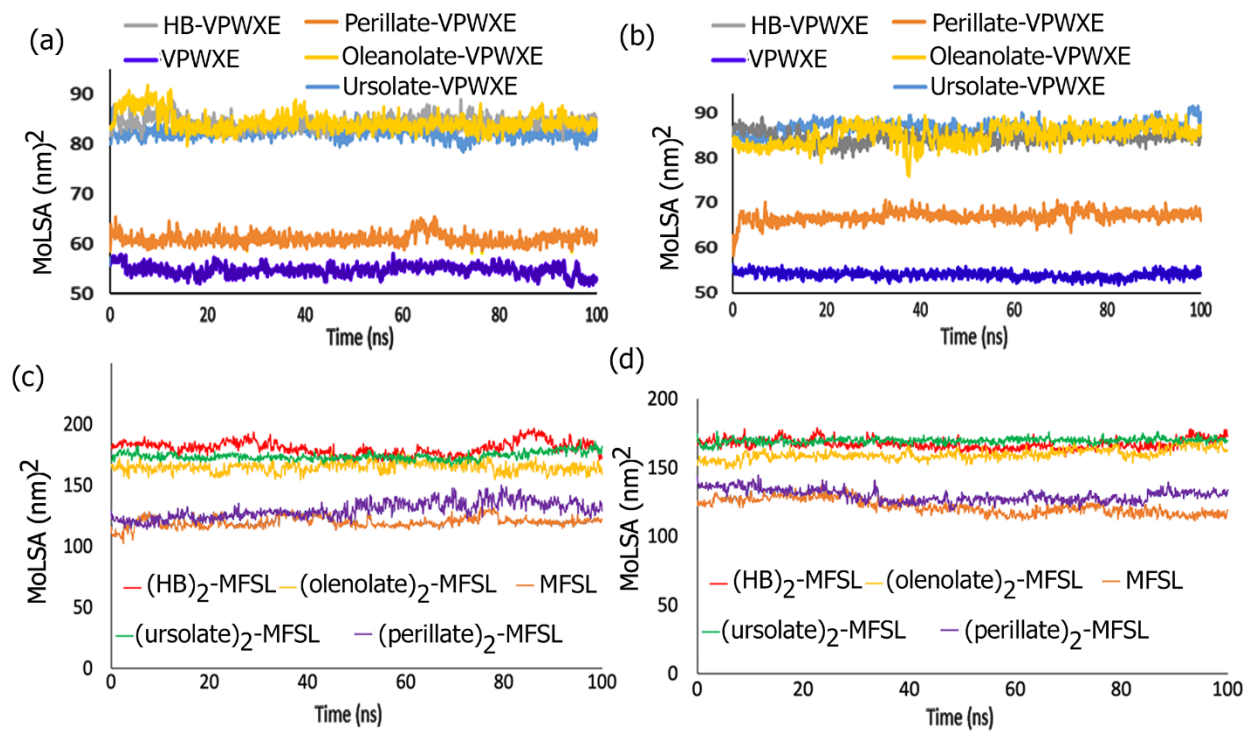

**Figure S4.** Comparison of MoLSA for (a) and (b) VPWXE and its conjugates with wild type and T790M/L858R EGFR receptors respectively. (c) and (d) MFSL and its conjugates with wild type and T790M/L858R EGFR receptors respectively. All simulations were carried out for 100 ns.

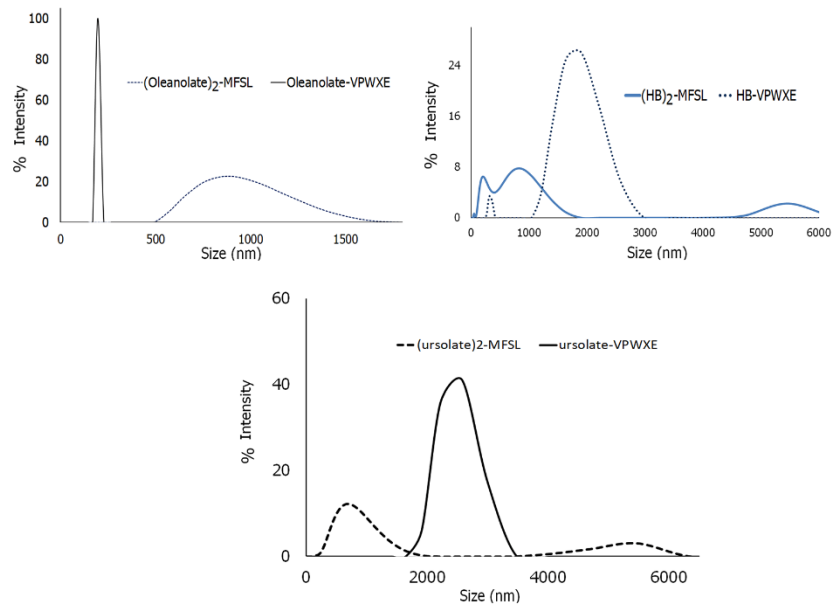

**Figure S5.** Comparison of Dynamic Light Scattering Analysis results to determine average size and distribution of nanoassemblies of peptide conjugates with tri-terpenes. Results shown are after two weeks of growth.

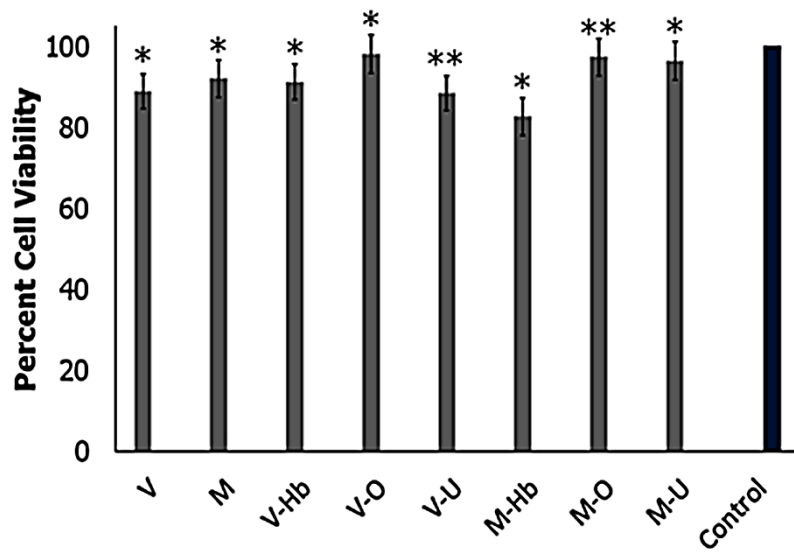

**Figure S6.** Fibroblast cell viability upon treatment for 24 hours with various nanoassemblies at a concentration of 3  $\mu$ M. (V-Hb) = HB-VPWXE; V-O = oleanoalate-VPWXE; V-U = Ursolate-VPWXE; M-HB = (HB)<sub>2</sub>-MFSL; M-O = (oleanolate)<sub>2</sub>-MFSL; M-U = (ursolate)<sub>2</sub>-MFSL. V= VPWXE; M = MFSL peptide \* represents p value<0.05, \*\* represents p value<0.01.

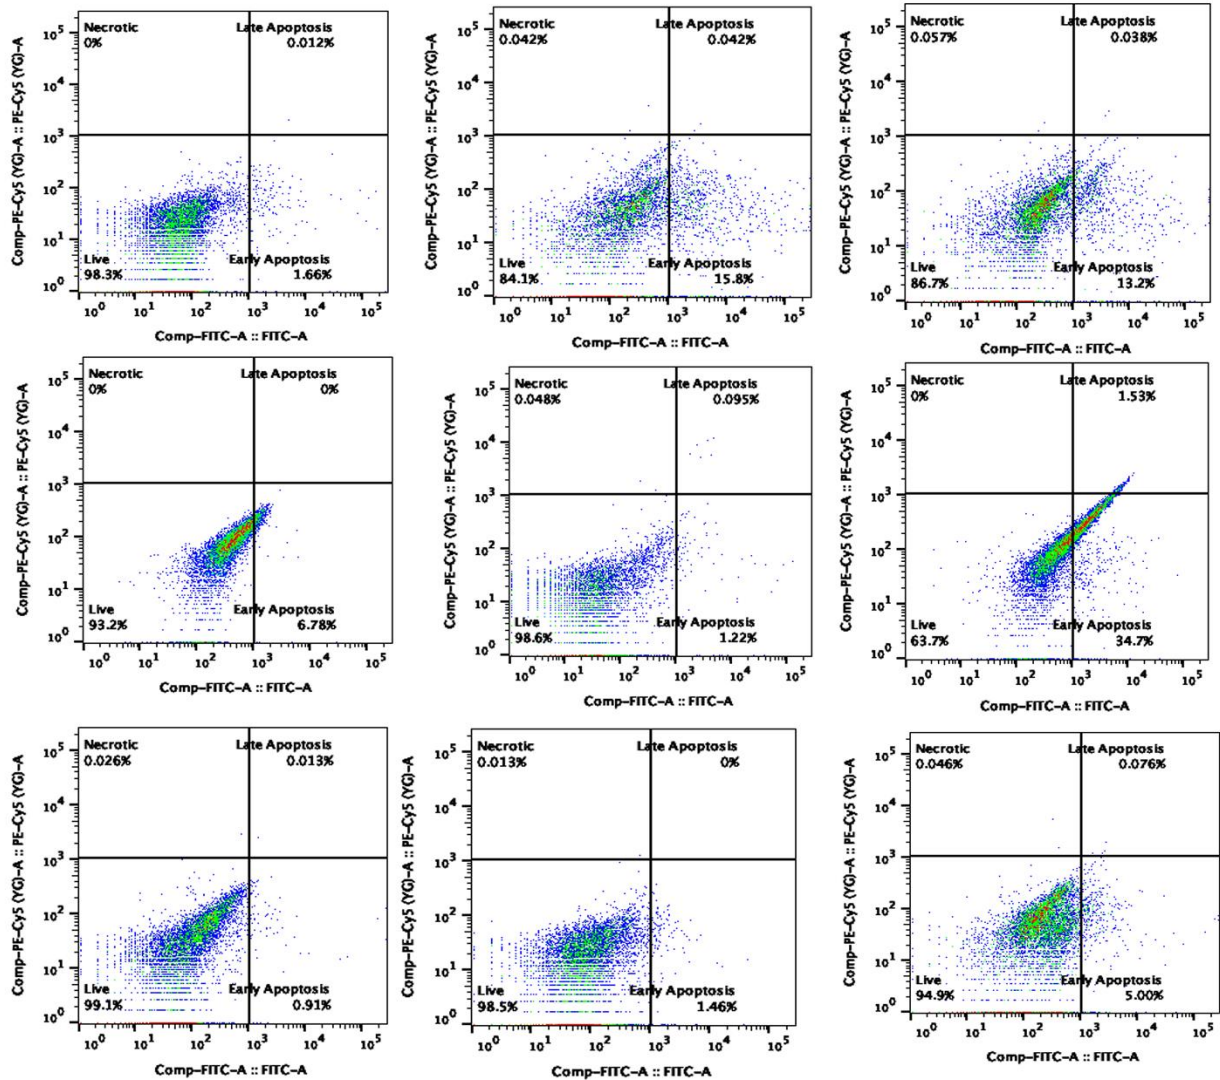

**Figure S7.** Apoptosis assay using FACS analysis for fibroblast cells upon treatment with nanoassemblies and peptides for 24 hours. Top row left to right: Control cells; cells treated with MFSL peptide; cells treated with VPWXE peptide; Middle row left to right: (oleanolate)<sub>2</sub>-MFSL treated cells; (ursolate)<sub>2</sub>-MFSL treated cells; (HB)<sub>2</sub>-MFSL treated cells; Bottom Row: Left to right: oleanolate-VPWXE treated cells; ursolate-VPWXE treated cells; HB-VPWXE treated cells.

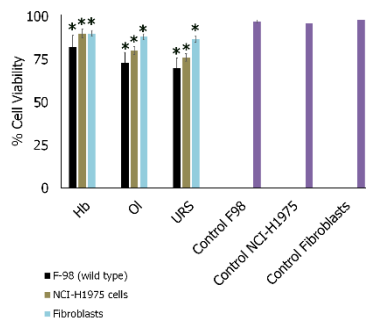

**Figure S8.** Viability studies with the three cell lines with unconjugated terpenes after 24-hour incubation. The concentration utilized was 3 $\mu$ M.
